# Supplementary material for: EGFR mediates epithelial‑mesenchymal transition through the Akt/GSK-3β/Snail signaling pathway to promote liver cancer proliferation and migration
Source: PubMed Central journal article supplement — Oncol Lett. 2023 Dec 18;27(2):59. doi: 10.3892/ol.2023.14192 (PMC10773224; doi:10.3892/ol.2023.14192), 2023-12-18
Supplement: Supplementary_Data.pdf [file Supplementary_Data.pdf]

**Table SI.** Clinicopathological characteristics of 40 patients with HCC.

| Characteristic          | Number of patients |
|-------------------------|--------------------|
| Sex                     |                    |
| Male                    | 36                 |
| Female                  | 4                  |
| Age, years              |                    |
| ≤50                     | 12                 |
| >50                     | 28                 |
| HBV                     |                    |
| Positive                | 36                 |
| Negative                | 4                  |
| Cirrhosis               |                    |
| No                      | 10                 |
| Yes                     | 30                 |
| Tumor number            |                    |
| Single                  | 35                 |
| Multiple (≥2)           | 5                  |
| Tumor size, cm          |                    |
| ≤5                      | 30                 |
| >5                      | 10                 |
| Tumor encapsulation     |                    |
| Complete                | 23                 |
| None                    | 17                 |
| TNM clinical stage (28) |                    |
| I-II                    | 29                 |
| III-IV                  | 11                 |
| Vascular invasion       |                    |
| No                      | 25                 |
| Yes                     | 15                 |
| Differentiation         |                    |
| I-II                    | 26                 |
| III-IV                  | 14                 |
| BCLC stage              |                    |
| 0+A                     | 23                 |
| B+C                     | 17                 |

BCLC, Barcelona Clinic Liver Cancer; HBV, hepatitis B virus; TNM, tumor-node-metastasis.
